# Supplementary material
Source: PubMed Central journal article supplement (PMC8013991)

---

# CONTATTI CON LE PERSONE ANZIANE, AGEISM, E COMPORTAMENTI DI CONTENIMENTO DURANTE LA PANDEMIA DI COVID-19

EMILIO PAOLO VISINTIN

JOURNAL OF COMMUNITY AND APPLIED SOCIAL PSYCHOLOGY

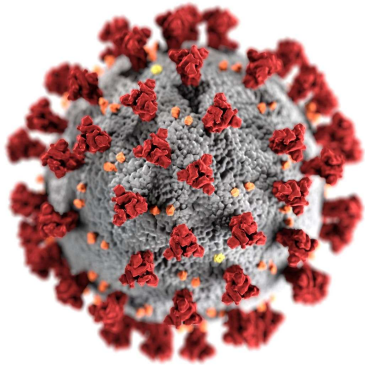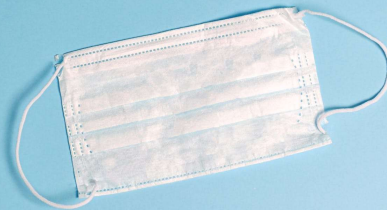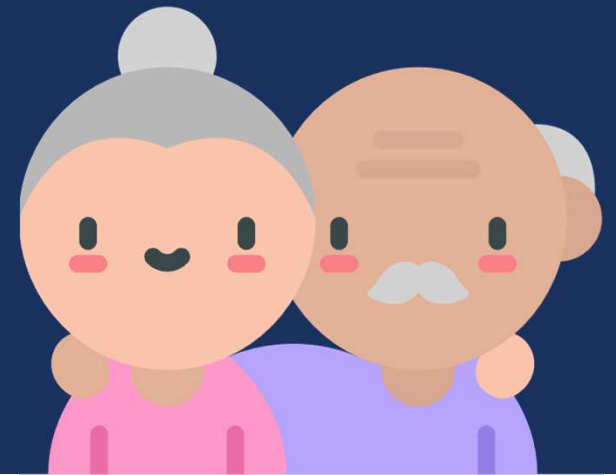

## DICHIARAZIONE DI RILEVANZA

Questa ricerca ha analizzato come i contatti e i pregiudizi nei confronti delle persone anziane siano associati a comportamenti volti a ridurre e rallentare la diffusione del coronavirus, come ad esempio lavarsi frequentemente le mani e mantenere le distanze fisiche dalle altre persone (comportamenti di contenimento). La ricerca è stata condotta con partecipanti italiani di diverse fasce d'età, durante il lockdown italiano (marzo-maggio 2020). Gli intervistati con contatti positivi con le persone anziane, atteggiamenti positivi verso le persone anziane e pregiudizi benevoli nei confronti delle persone anziane hanno dichiarato di adottare maggiormente comportamenti di contenimento. Questa ricerca ha dimostrato l'importanza di promuovere contatti positivi con le persone anziane, poiché relazioni positive con le persone anziane potrebbero contribuire ad aumentare i comportamenti di prevenzione e contenimento del coronavirus, e contribuire quindi alla salute pubblica.

## RISULTATI

- **Contatto intergruppi.** Sulla base della teoria del contatto intergruppi, avere interazioni positive con i membri di un gruppo esterno può ridurre i pregiudizi. Questa ricerca ha confermato tali risultati applicati ai rapporti di età nel contesto italiano, perché gli intervistati con maggiori contatti positivi con le persone anziane hanno riportato atteggiamenti più positivi e meno pregiudizi ostili nei confronti degli anziani.
- **Ageism benevolo.** L'ageism benevolo è una forma di pregiudizio nei confronti delle persone anziane che consiste in una visione omogenea delle persone anziane come vulnerabili e dipendenti, ed il conseguente trattamento paternalistico delle persone anziane (ad esempio, attraverso l'uso di un linguaggio eccessivamente semplificato). Sebbene tale trattamento abbia conseguenze negative per le persone anziane (ad esempio, ridotta autonomia), l'ageism benevolo può essere associato a comportamenti di contenimento, perché tali comportamenti possono essere percepiti come volti a proteggere le persone anziane.

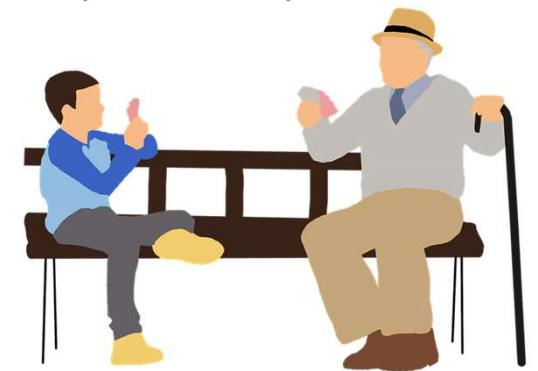

## IMPLICAZIONI PRATICHE

- **Contatti con le persone anziane.** Le società dovrebbero sforzarsi di incoraggiare contatti positivi tra giovani, adulti e persone anziane. Ad esempio, le organizzazioni dovrebbero promuovere la diversità di età nei luoghi di lavoro. Inoltre, le comunità potrebbero proporre opportunità di incontro tra persone di diverse fasce d'età.
- **Contatti con le persone anziane.** In tempi di distanza sociale, sarebbe importante promuovere contatti telefonici o online con le persone anziane. Ad esempio, le comunità potrebbero promuovere programmi in cui giovani e adulti telefonano a persone anziane, per conoscerle meglio.
- **Messaggi volti a promuovere comportamenti di contenimento contro la diffusione del coronavirus.** I messaggi che incoraggiano a seguire linee guida comportamentali volte a ridurre e rallentare la diffusione del coronavirus potrebbero enfatizzare la necessità di proteggere le persone anziane.

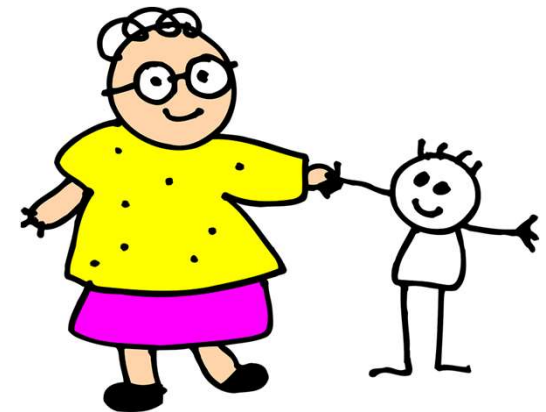

Supplement: CASP-31-314-s002.pdf [file CASP-31-314-s002.pdf]
